# Supplementary material for: Micellar solution with pH responsive viscoelasticity and colour switching property
Source: Royal Society of Chemistry journal article supplement (doi:10.1039/c4ra14195d), 2015-01-01
Supplement: c4ra14195d4.pdf [file c4ra14195d4.pdf]

## Micellar Solution with pH Responsive Viscoelasticity and Colour Switching Property

Linnet Rose J.,<sup>a</sup> B. V. R. Tata,<sup>b</sup> Yeshayahu Talmon,<sup>c</sup> V. K. Aswal,<sup>d</sup> P. A. Hassan<sup>e</sup> and Lisa Sreejith<sup>\*a</sup>

### Supporting Information

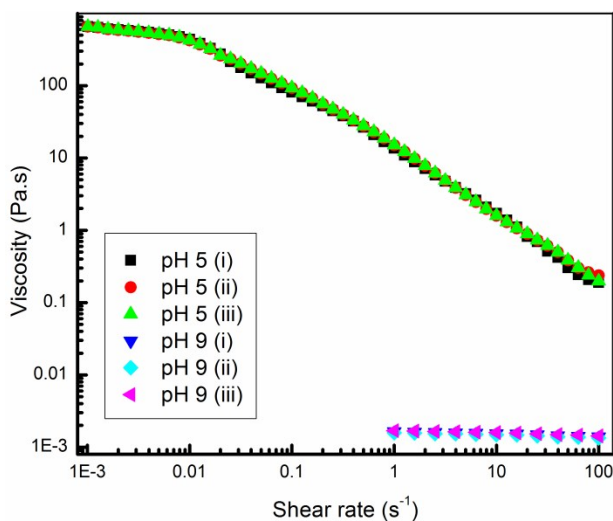

Fig. S1. Steady shear rheology of 100 mM CTAB/ 40 mM OCA sample at repeated cycles of pH variation.

(Standard deviation of measurements at pH 5 is found to be  $657.28 \pm 2.33$ )

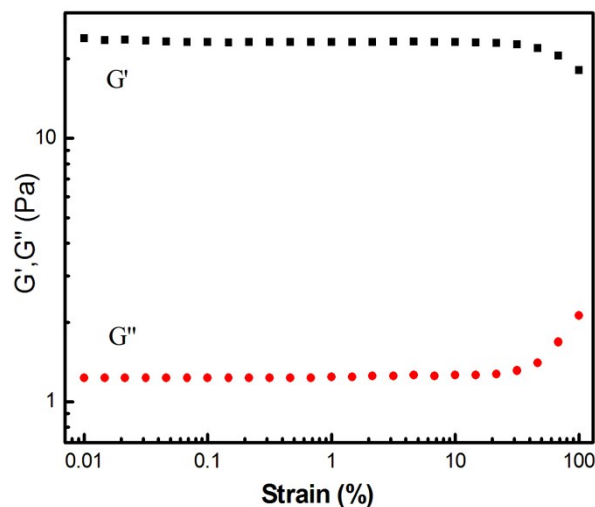

Fig S2: Elastic (G') and viscous (G'') moduli of 100 mM CTAB/ 40 mM OCA sample at pH 5, as a function of strain amplitude.

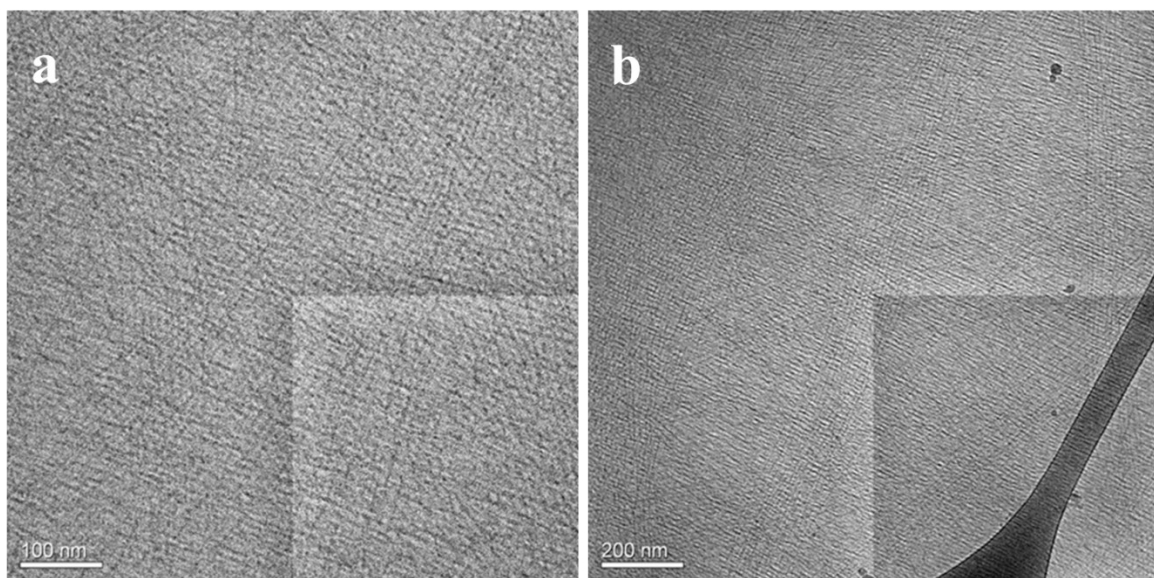

Fig S3. Additional cryo-TEM images of 100 mM CTAB/ 40 mM OCA sample at pH 5, at two different magnifications.
