# Supplementary figures and images for: Micellar solution with pH responsive viscoelasticity and colour switching property
Source: Royal Society of Chemistry journal article supplement (doi:10.1039/c4ra14195d), 2015-01-01

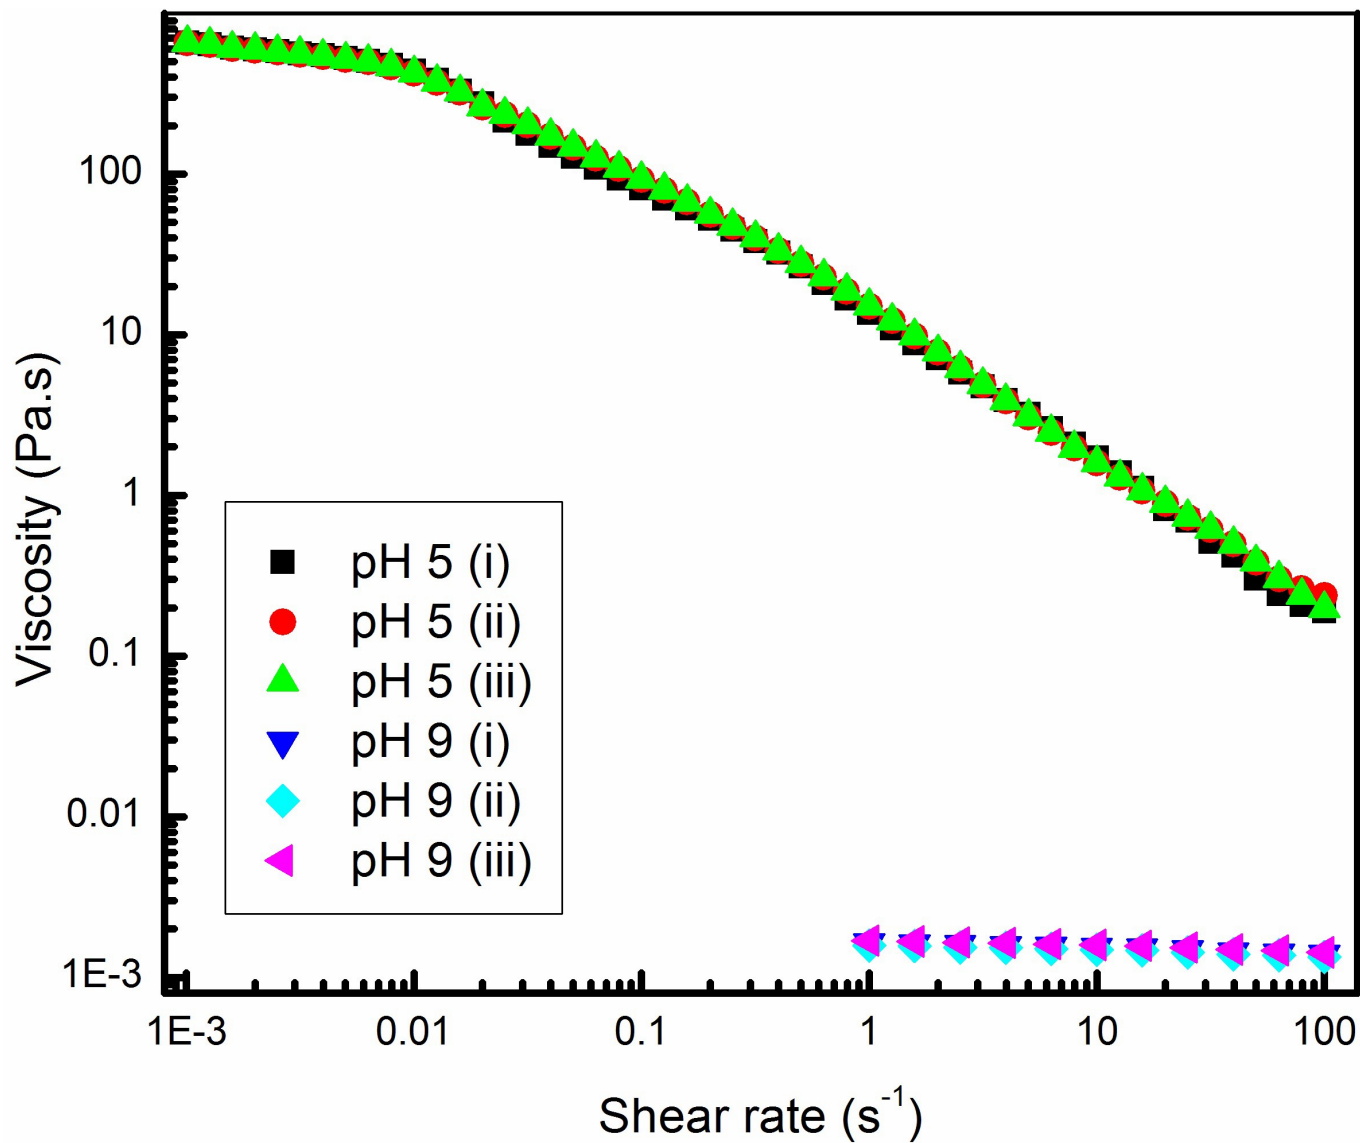

Supplement: c4ra14195d1.pdf [file c4ra14195d1.pdf]

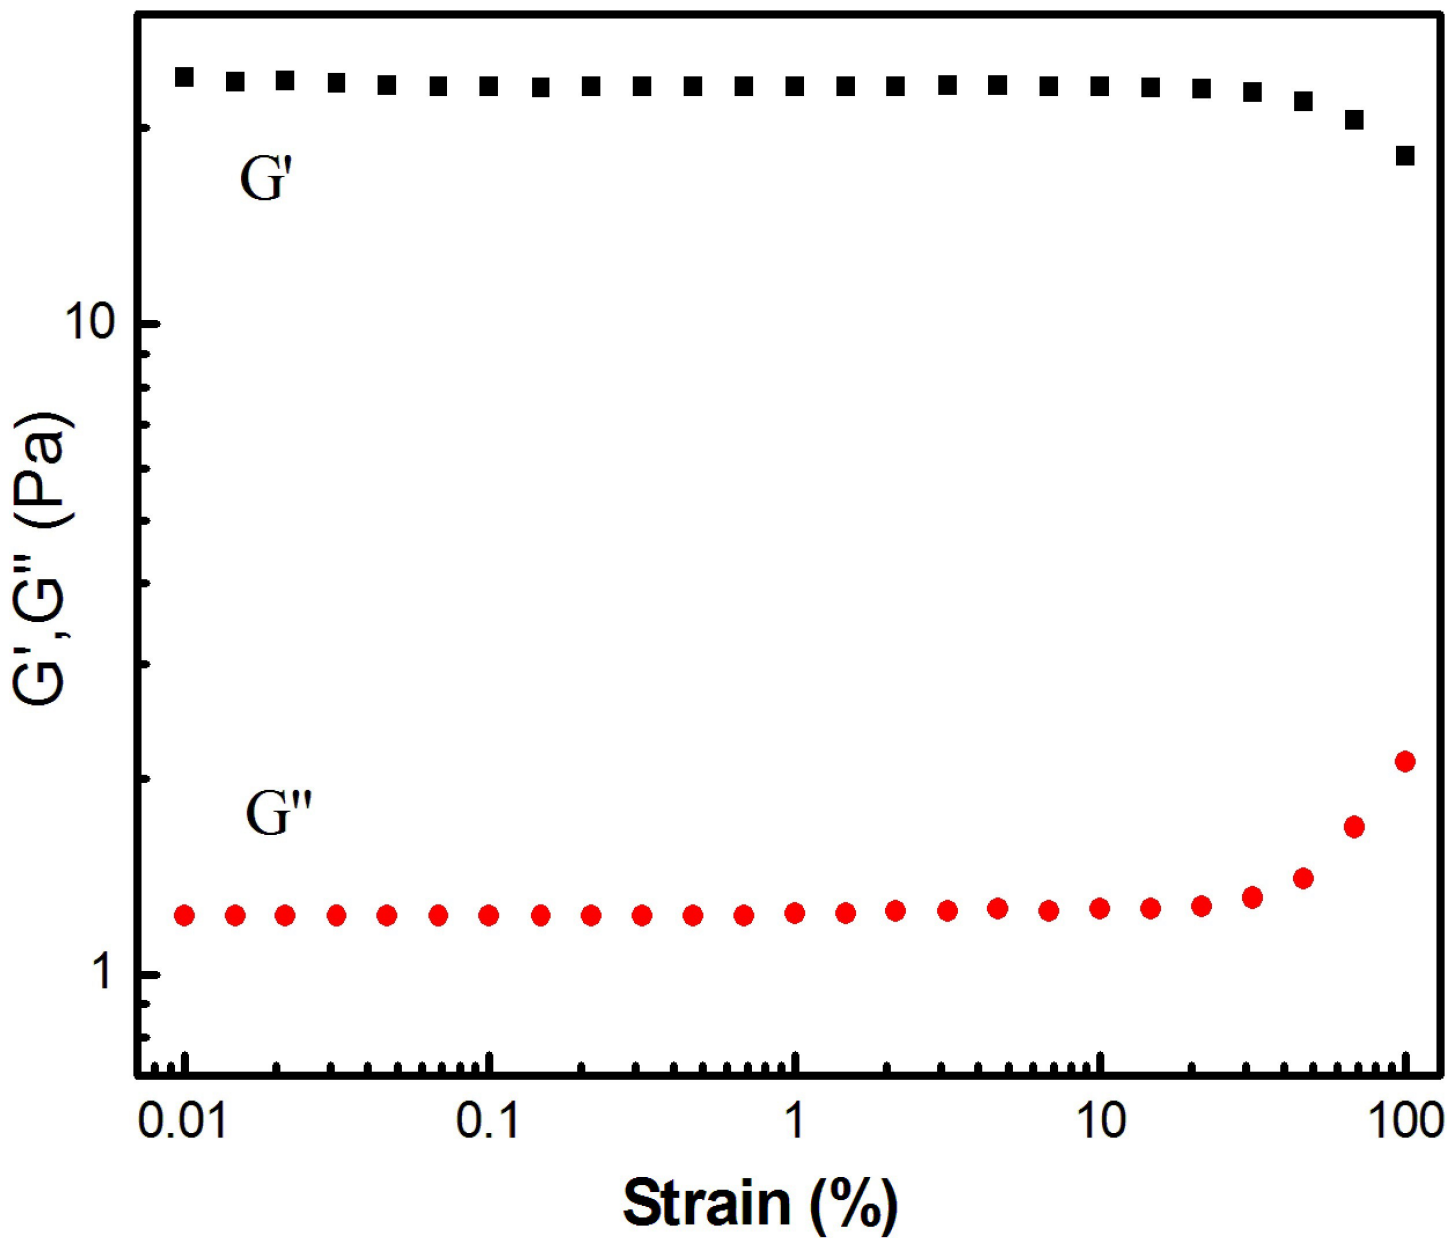

Supplement: c4ra14195d2.pdf [file c4ra14195d2.pdf]

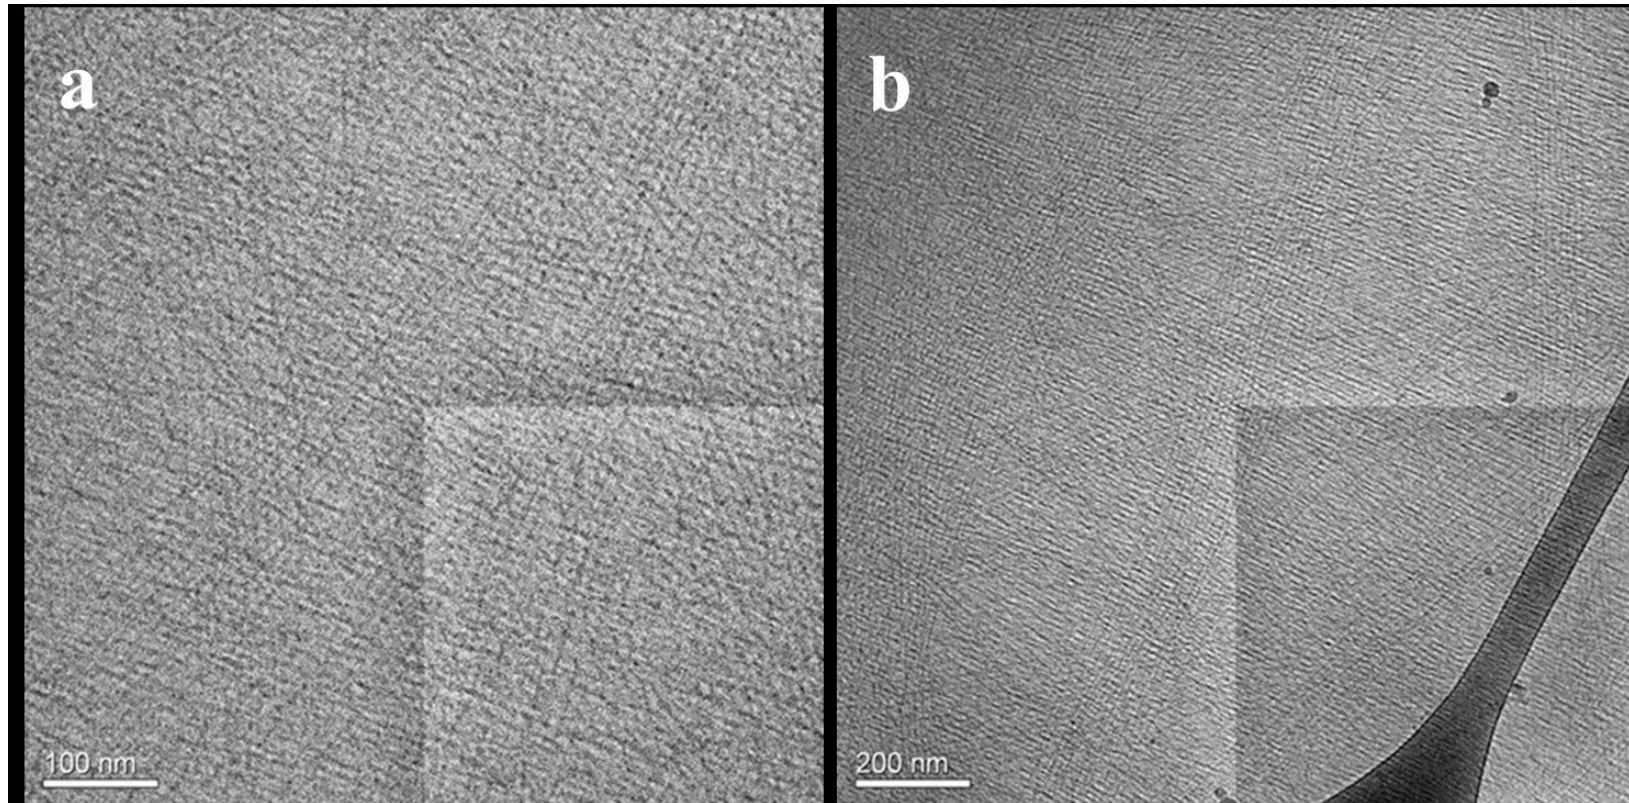

Supplement: c4ra14195d3.pdf [file c4ra14195d3.pdf]
